# Supplementary material for: Mediating EGFR-TKI Resistance by VEGF/VEGFR Autocrine Pathway in Non-Small Cell Lung Cancer
Source: MDPI journal article supplement (doi:10.3390/cells11101694), 2022-05-19
Supplement: s1 [file s1]

**TABLE S1. Table showing doubling times of H2170 and H358 parental and resistant cell lines.**

| <b>Cell Line</b> | <b>No of Cells Plated</b> | <b>No of Cells Counted</b> | <b>Average</b>         | <b>No of Days</b> | <b>Doubling Time (Days)</b> | <b>Average Doubling Time</b> | <b>Standard Deviation</b> |
|------------------|---------------------------|----------------------------|------------------------|-------------------|-----------------------------|------------------------------|---------------------------|
| H2170P           | 1 x 10 <sup>5</sup>       | 1.34 x 10 <sup>6</sup>     | 1.39 x 10 <sup>6</sup> | 6                 | 1.6                         | 1.58                         | 0.017                     |
| H2170P           | 1 x 10 <sup>5</sup>       | 1.42 x 10 <sup>6</sup>     |                        | 6                 | 1.57                        |                              |                           |
| H2170P           | 1 x 10 <sup>5</sup>       | 1.42 x 10 <sup>6</sup>     |                        | 6                 | 1.57                        |                              |                           |
| H2170ER          | 1 x 10 <sup>5</sup>       | 1.23 x 10 <sup>6</sup>     | 1.26 x 10 <sup>6</sup> | 6                 | 1.82                        | 1.8                          | 0.062                     |
| H2170ER          | 1 x 10 <sup>5</sup>       | 1.19 x 10 <sup>6</sup>     |                        | 6                 | 1.85                        |                              |                           |
| H2170ER          | 1 x 10 <sup>5</sup>       | 1.38 x 10 <sup>6</sup>     |                        | 6                 | 1.73                        |                              |                           |
|                  |                           |                            |                        |                   |                             |                              |                           |
| H358P            | 1 x 10 <sup>5</sup>       | 7.8 x 10 <sup>5</sup>      | 7.6 x 10 <sup>5</sup>  | 8                 | 2.7                         | 2.74                         | 0.047                     |
| H358P            | 1 x 10 <sup>5</sup>       | 7.3 x 10 <sup>5</sup>      |                        | 8                 | 2.79                        |                              |                           |
| H358P            | 1 x 10 <sup>5</sup>       | 7.7 x 10 <sup>5</sup>      |                        | 8                 | 2.72                        |                              |                           |
| H358ER           | 1 x 10 <sup>5</sup>       | 1.25 x 10 <sup>6</sup>     | 1.17 x 10 <sup>6</sup> | 8                 | 2.41                        | 2.48                         | 0.061                     |
| H358ER           | 1 x 10 <sup>5</sup>       | 1.15 x 10 <sup>6</sup>     |                        | 8                 | 2.49                        |                              |                           |
| H358ER           | 1 x 10 <sup>5</sup>       | 1.12 x 10 <sup>6</sup>     |                        | 8                 | 2.53                        |                              |                           |

**TABLE S2. Table showing demographics for NSCLC patients used for studying expression of VEGFR-2.**

| <b>Gender</b> |               | <b>Race</b>      |                      | <b>Smoking Status</b>    |                          | <b>Age</b>   |
|---------------|---------------|------------------|----------------------|--------------------------|--------------------------|--------------|
| <b>Male</b>   | <b>Female</b> | <b>Caucasian</b> | <b>Non-Caucasian</b> | <b>&lt;30 pack years</b> | <b>&gt;30 pack years</b> |              |
| <b>25</b>     | <b>23</b>     | <b>46</b>        | <b>2</b>             | <b>9</b>                 | <b>37</b>                | <b>42-89</b> |
